# Supplementary material
Source: publisher figshare collection journal article supplement (https://acs.figshare.com/ndownloader/files/25871996)
Supplement: Supplementary file 1 [file 25871996]

Supporting Information for:

# Surface fluorination modification and anti-biofouling study of pHEMA hydrogel

Xinlin Yang<sup>1</sup>, Mengmeng Cui<sup>1</sup>, Jinsheng Zhou<sup>1</sup>, Lu Zhang<sup>1</sup>, Haohao Zhou<sup>1</sup>,

Zhongkuan Luo<sup>1</sup>, Li Zhou<sup>1</sup>, Huiyuan Hu<sup>1,\*</sup>

<sup>1</sup> College of Chemistry and Environmental Engineering, Shenzhen University,  
Shenzhen, 518060; China

Corresponding Author: Huiyuan Hu; E-mail: [huhuiyuan@163.com](mailto:huhuiyuan@163.com).

## Content

Figure S1. Control experiments: (a) the volume of F15; (b) the DMAP content; (c)  
reaction temperature; (d) reaction time.

S2

**Evaluation of reaction factors.** Control experiments were carried out to find out the optimal experimental conditions. The hydrophobic property of the pHEMA-F15 could be enhanced with the grafting density of F15 on the surface. In order to evaluate the extent of grafting, water contact angles ( $\theta$ ) were measured by a contact angle meter (Shanghai Zhongchen co., LTD, JC2000C1) at room temperature. Each sample was tested at 5 different locations of the surface. The highest water contact angle of the membrane was about  $135.5^\circ$  after modification.

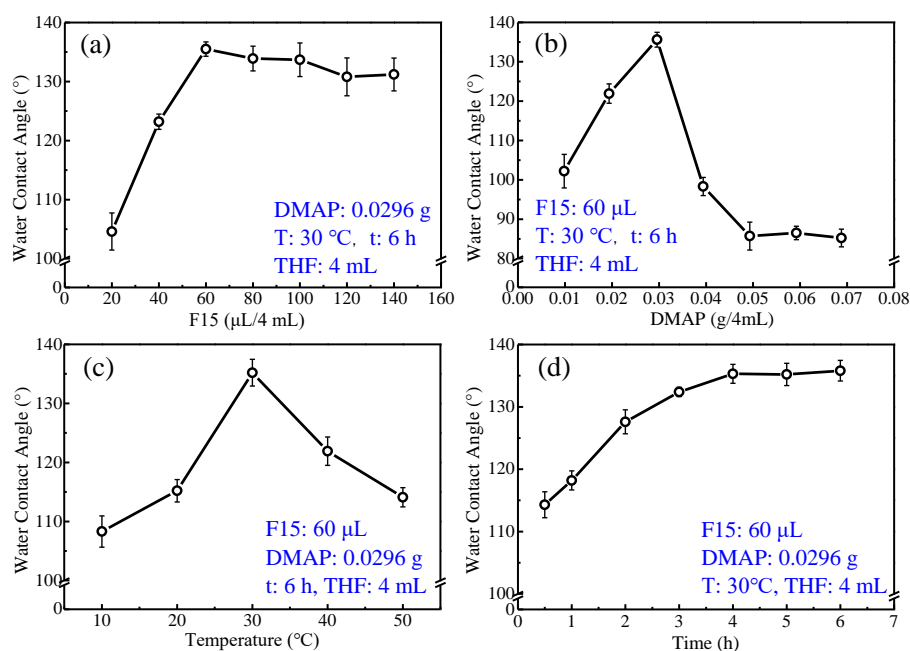

**Figure S1.** Control experiments: (a) the volume of F15; (b) the DMAP content; (c) reaction temperature; (d) reaction time.

According to the results of the above reaction factor control experiments, the optimal reaction conditions of this fluorinated modification experiment are as follows: F15 = 60  $\mu$ L, DMAP = 0.0298 g, T = 30°C, t = 4 h. Under the optimal reaction conditions of the fluorination modification, the hydrophobic property of the modified hydrogel membrane can be improved from  $64.2 \pm 1.6^\circ$  to

$135.6 \pm 1.5^\circ$ .
